# Supplementary material for: Enhancement of the Antioxidant and Skin Permeation Properties of Betulin and Its Derivatives
Source: MDPI journal article supplement (doi:10.3390/molecules26113435), 2021-06-05

## Supplementary material

### Enhancement of the Antioxidant and Skin Permeation Properties of Betulin and its Derivatives

Andrzej Günther <sup>1,\*</sup>, Edyta Makuch <sup>1</sup>, Anna Nowak <sup>2</sup>, Wiktoria Duchnik <sup>2</sup>, Łukasz Kucharski <sup>2</sup>,  
Robert Pełech <sup>1</sup> and Adam Klimowicz <sup>2</sup>

<sup>1</sup> Faculty of Chemical Technology and Engineering, Department of Chemical Organic Technology and Polymeric Materials, West Pomeranian University of Technology, Szczecin, PL-70322 Szczecin, Poland; emakuch@zut.edu.pl (E.M.); rpelech@zut.edu.pl (R.P.)

<sup>2</sup> Department of Cosmetic and Pharmaceutical Chemistry, Pomeranian Medical University in Szczecin, PL-70111 Szczecin, Poland; anowak@pum.edu.pl (A.N.); wduchnik@pum.edu.pl (W.D.); lukasz.kucharski@pum.edu.pl (Ł.K.); adam.klimowicz@pum.edu.pl (A.K.)

\* Correspondence: andrzej.gunther@zut.edu.pl;

## **Table of contents**

|                                                                                                |             |
|------------------------------------------------------------------------------------------------|-------------|
| <b><math>^1\text{H}</math> NMR and <math>^{13}\text{C}</math> NMR spectra of compound (1)</b>  | <b>S 3</b>  |
| <b><math>^1\text{H}</math> NMR and <math>^{13}\text{C}</math> NMR spectra of compound (2)</b>  | <b>S 4</b>  |
| <b><math>^1\text{H}</math> NMR and <math>^{13}\text{C}</math> NMR spectra of compound (3)</b>  | <b>S 5</b>  |
| <b><math>^1\text{H}</math> NMR and <math>^{13}\text{C}</math> NMR spectra of compound (4)</b>  | <b>S 6</b>  |
| <b><math>^1\text{H}</math> NMR and <math>^{13}\text{C}</math> NMR spectra of compound (5)</b>  | <b>S 7</b>  |
| <b><math>^1\text{H}</math> NMR and <math>^{13}\text{C}</math> NMR spectra of compound (6)</b>  | <b>S 8</b>  |
| <b><math>^1\text{H}</math> NMR and <math>^{13}\text{C}</math> NMR spectra of compound (7)</b>  | <b>S 9</b>  |
| <b><math>^1\text{H}</math> NMR and <math>^{13}\text{C}</math> NMR spectra of compound (8)</b>  | <b>S 10</b> |
| <b><math>^1\text{H}</math> NMR and <math>^{13}\text{C}</math> NMR spectra of compound (9)</b>  | <b>S 11</b> |
| <b><math>^1\text{H}</math> NMR and <math>^{13}\text{C}</math> NMR spectra of compound (10)</b> | <b>S 12</b> |
| <b><math>^1\text{H}</math> NMR and <math>^{13}\text{C}</math> NMR spectra of compound (11)</b> | <b>S 13</b> |

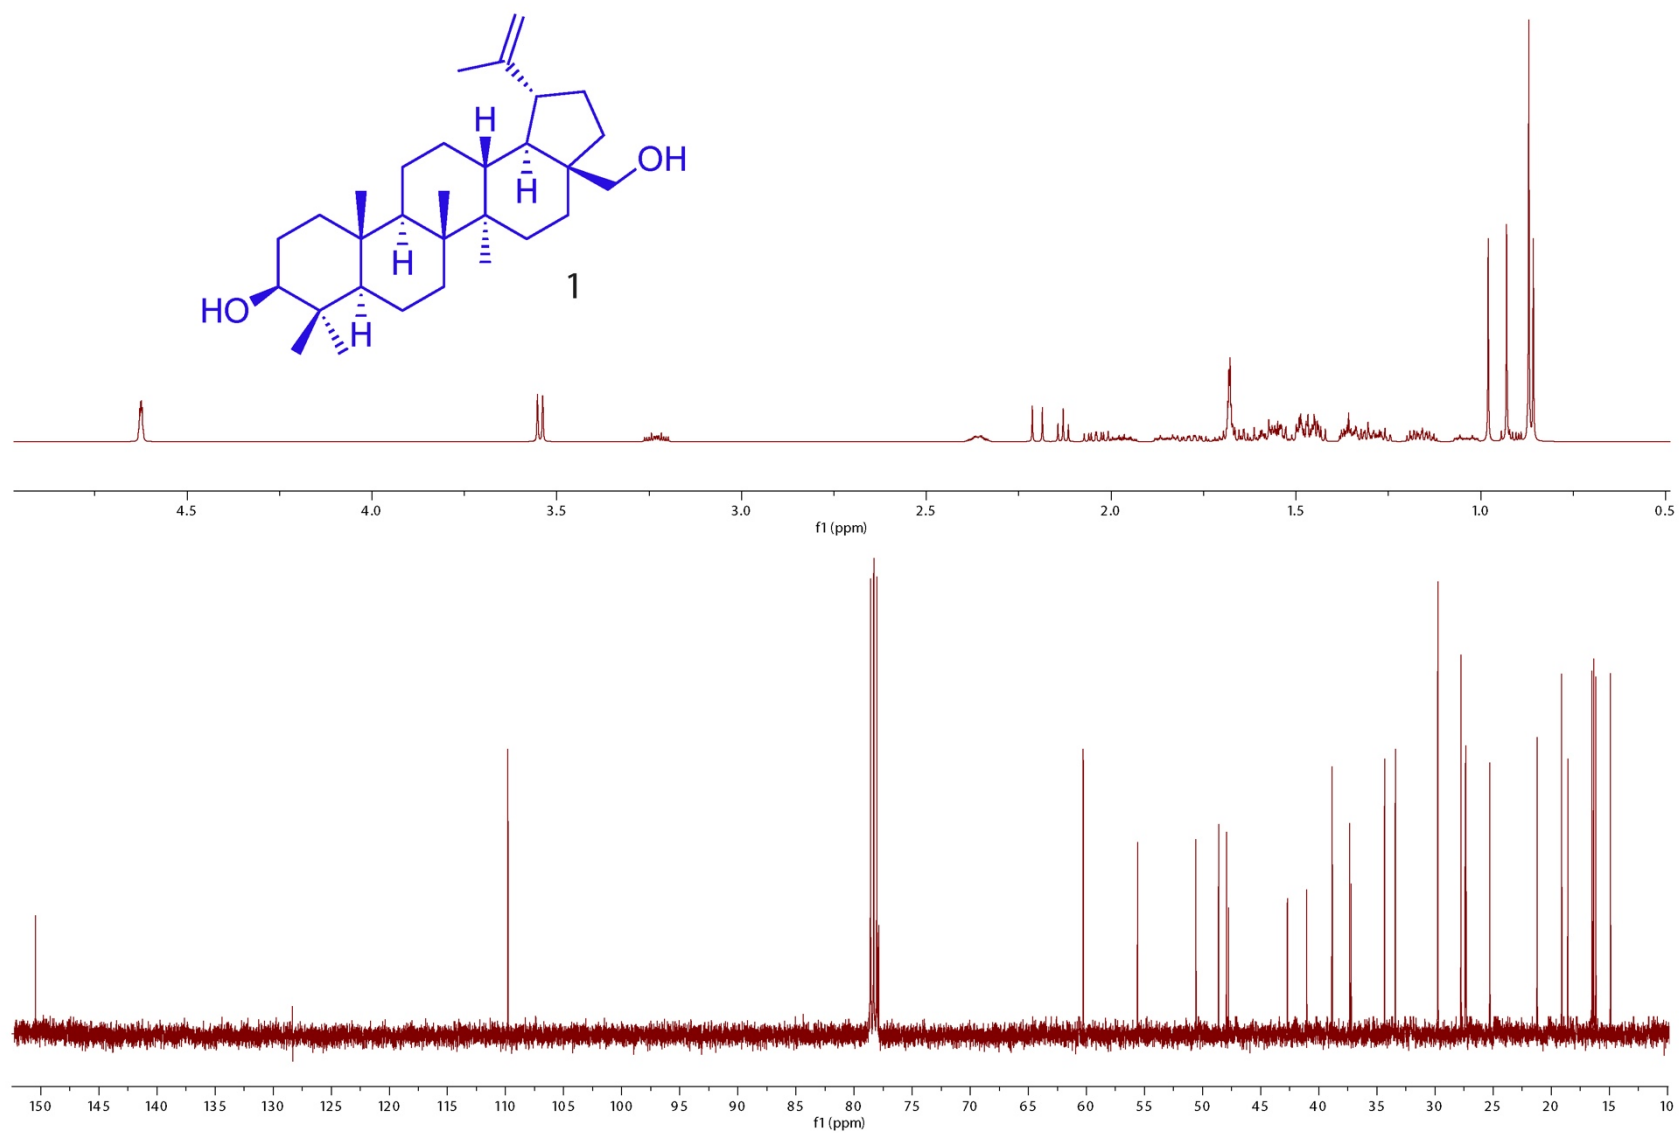

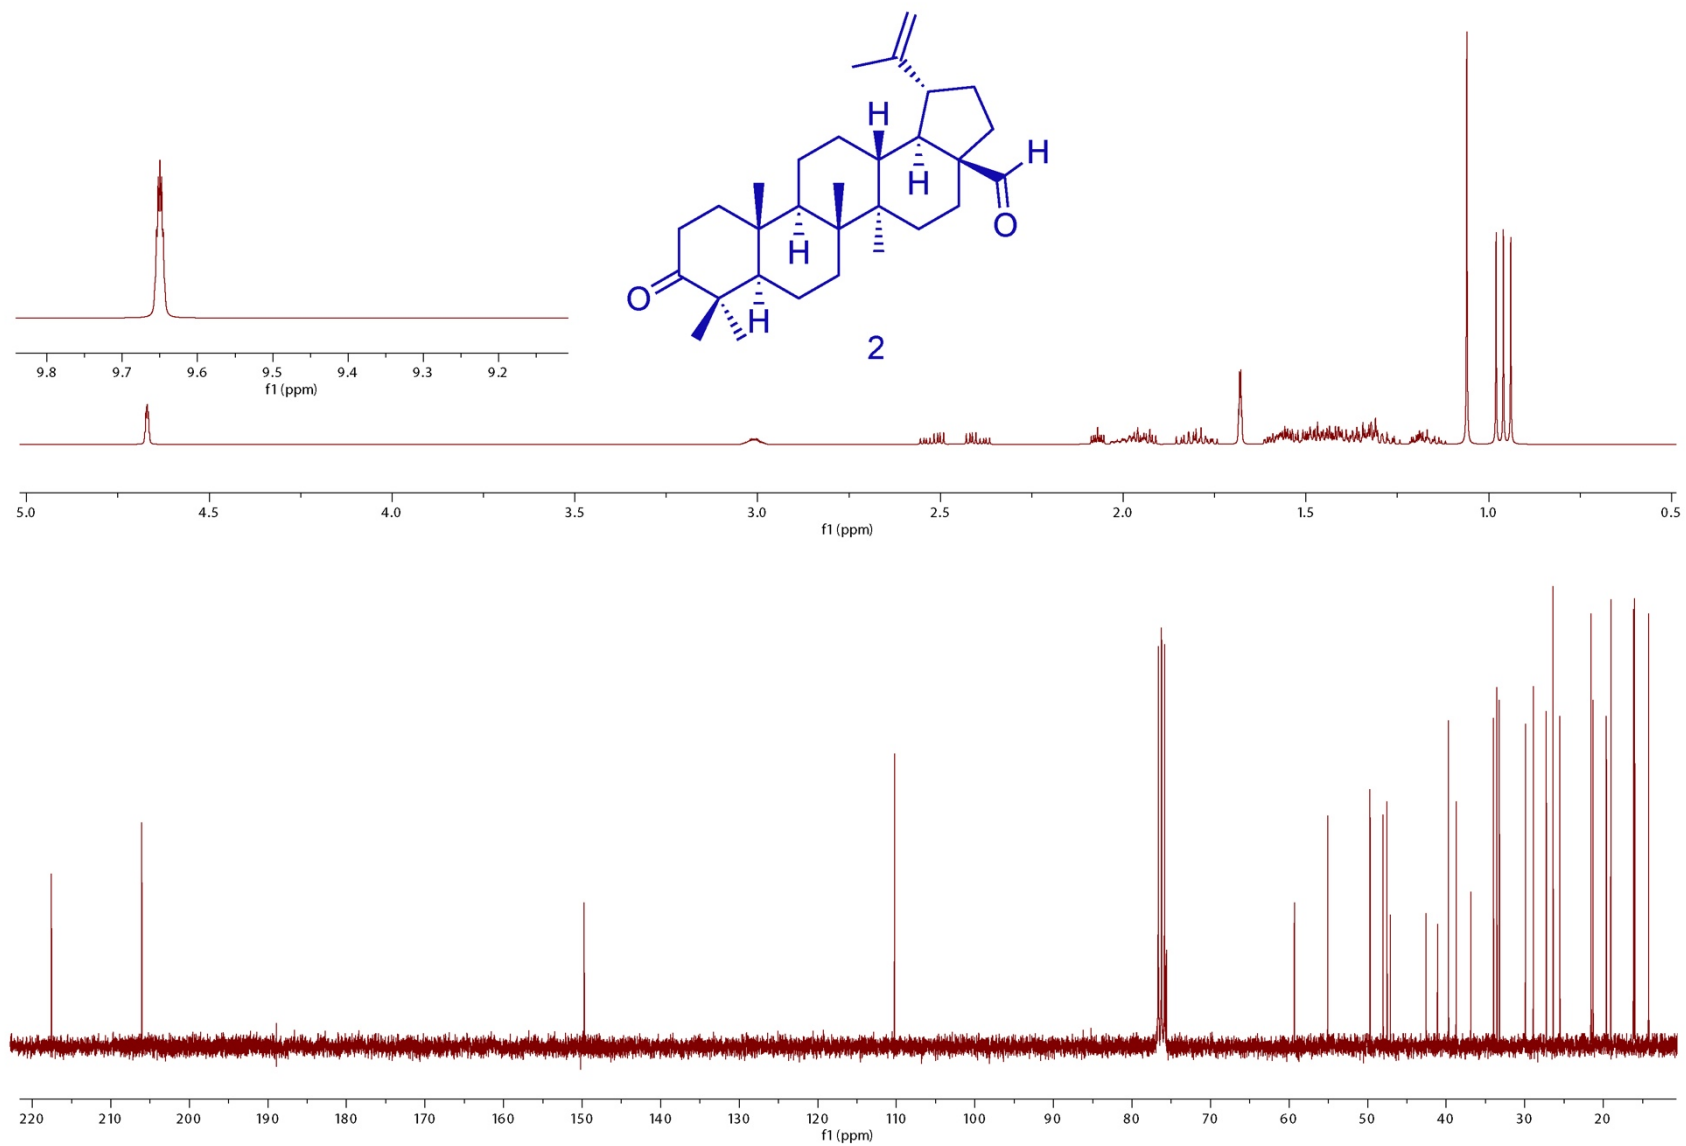

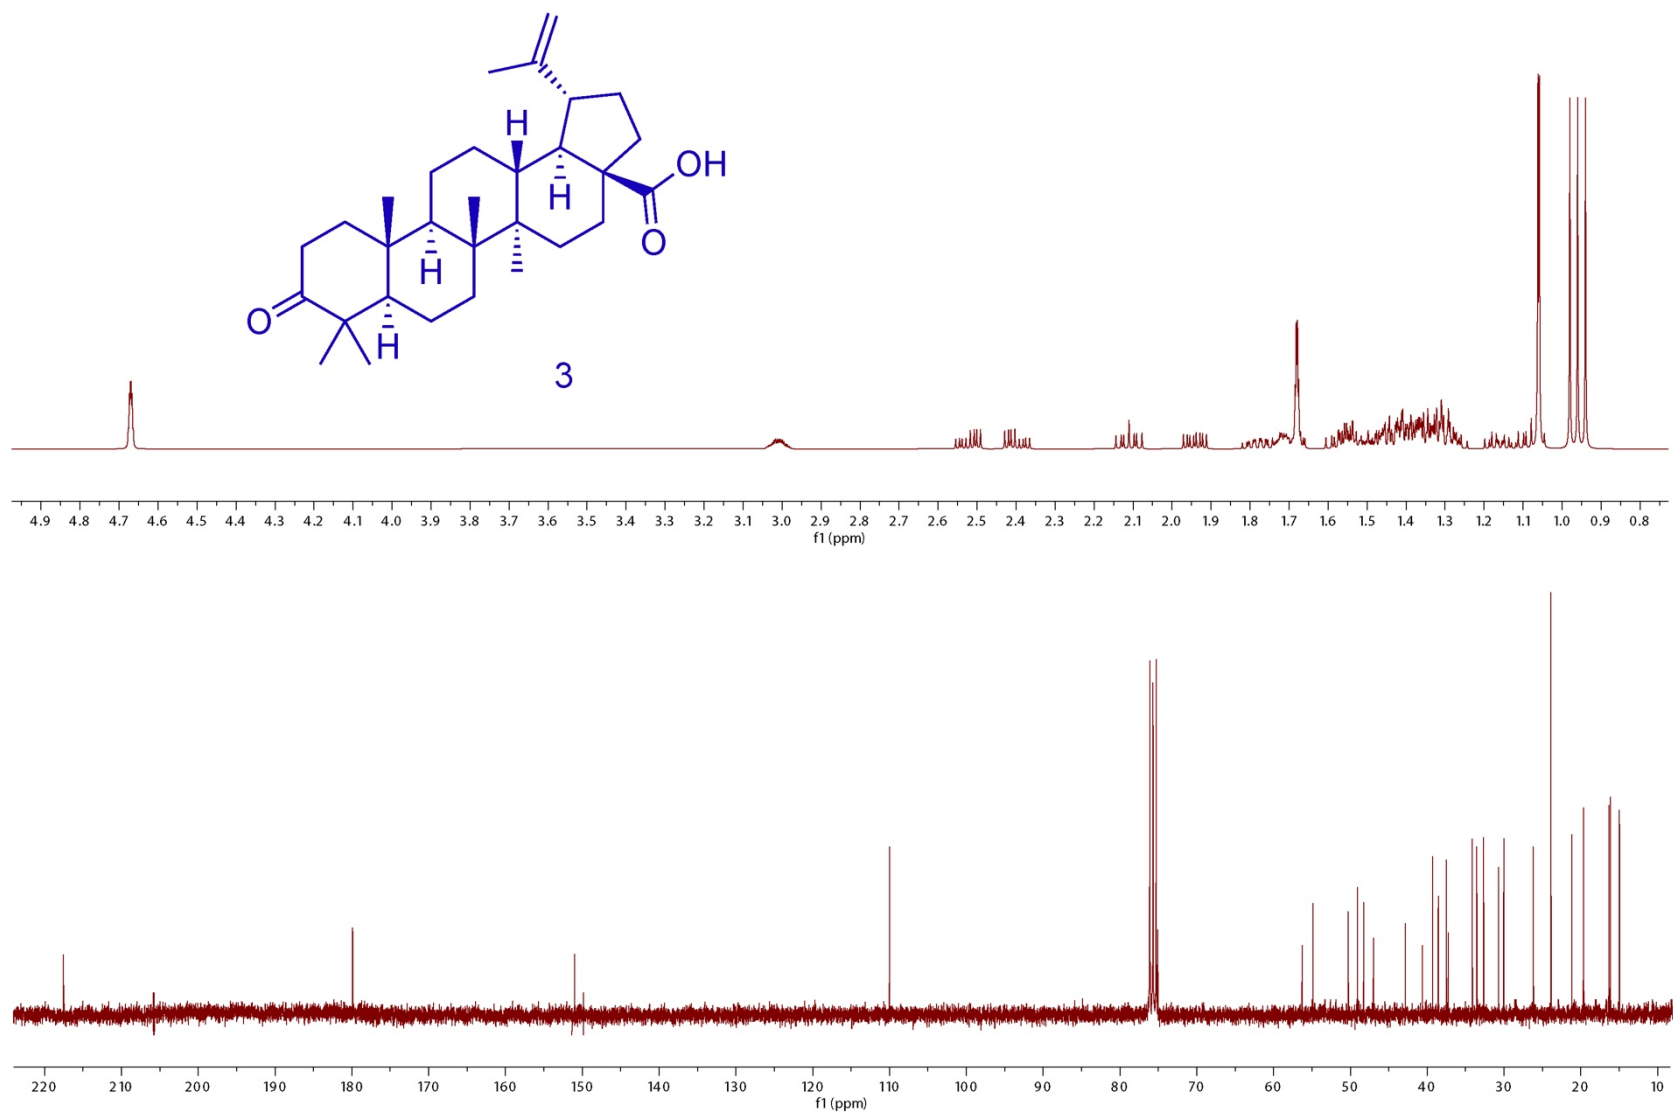

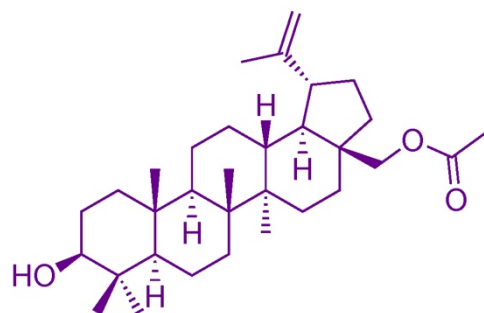

4

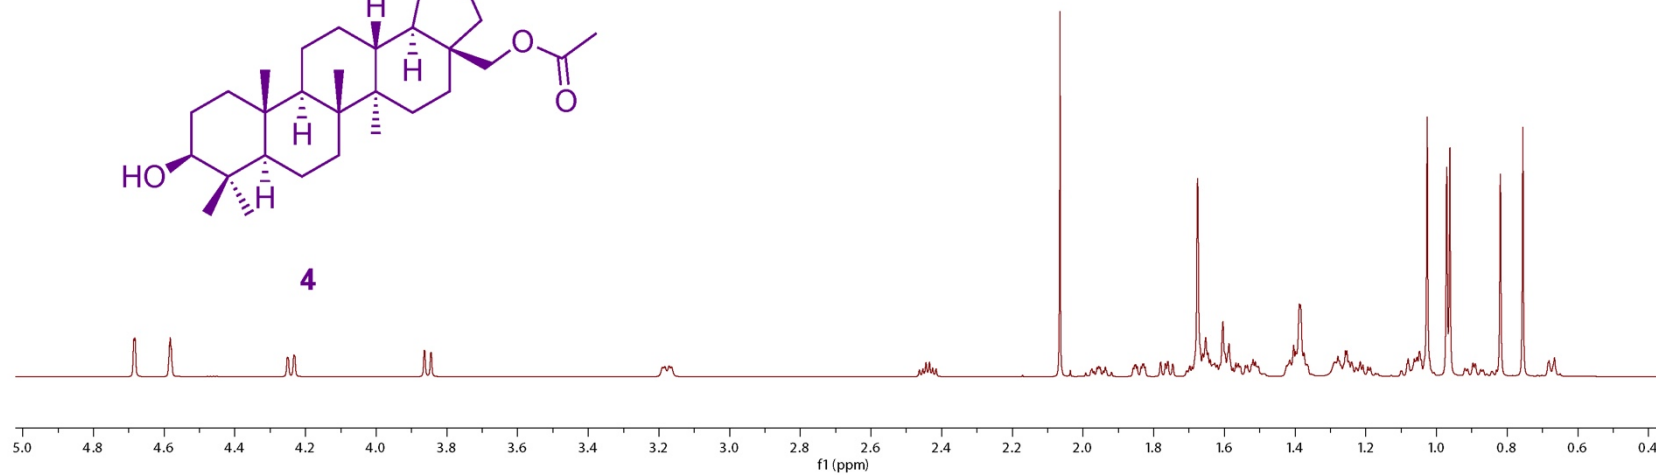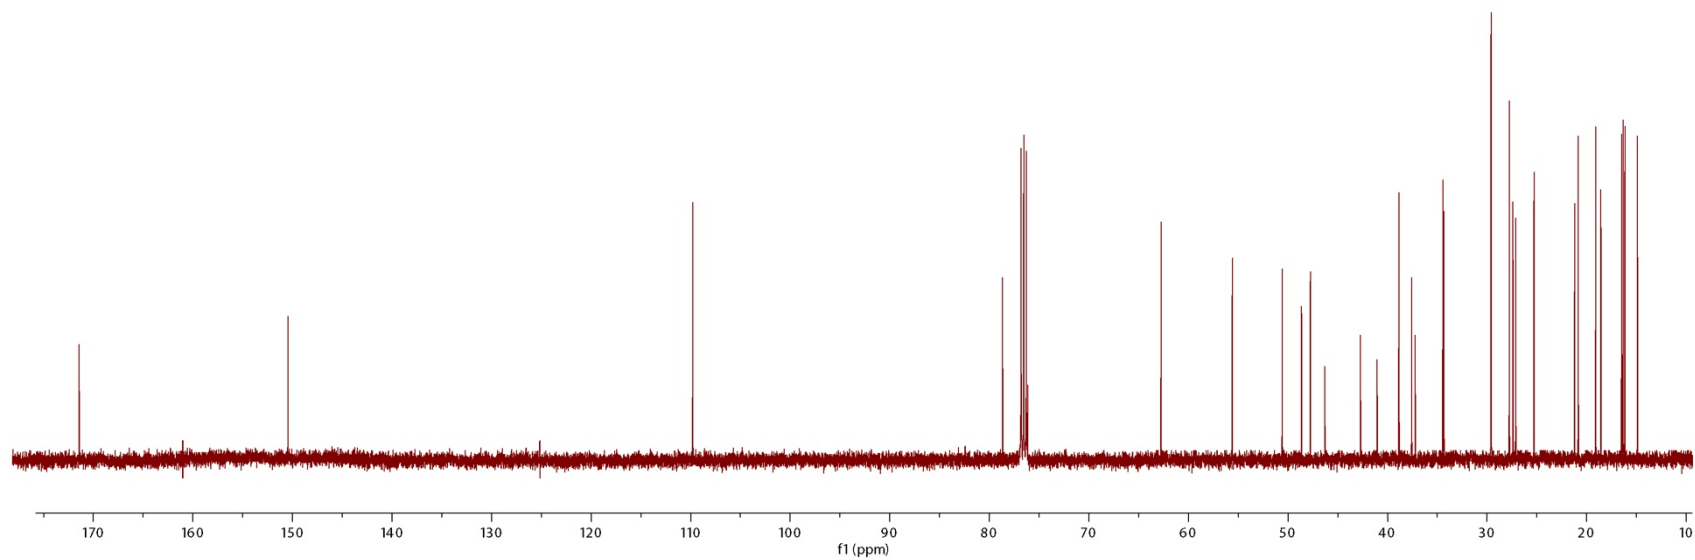

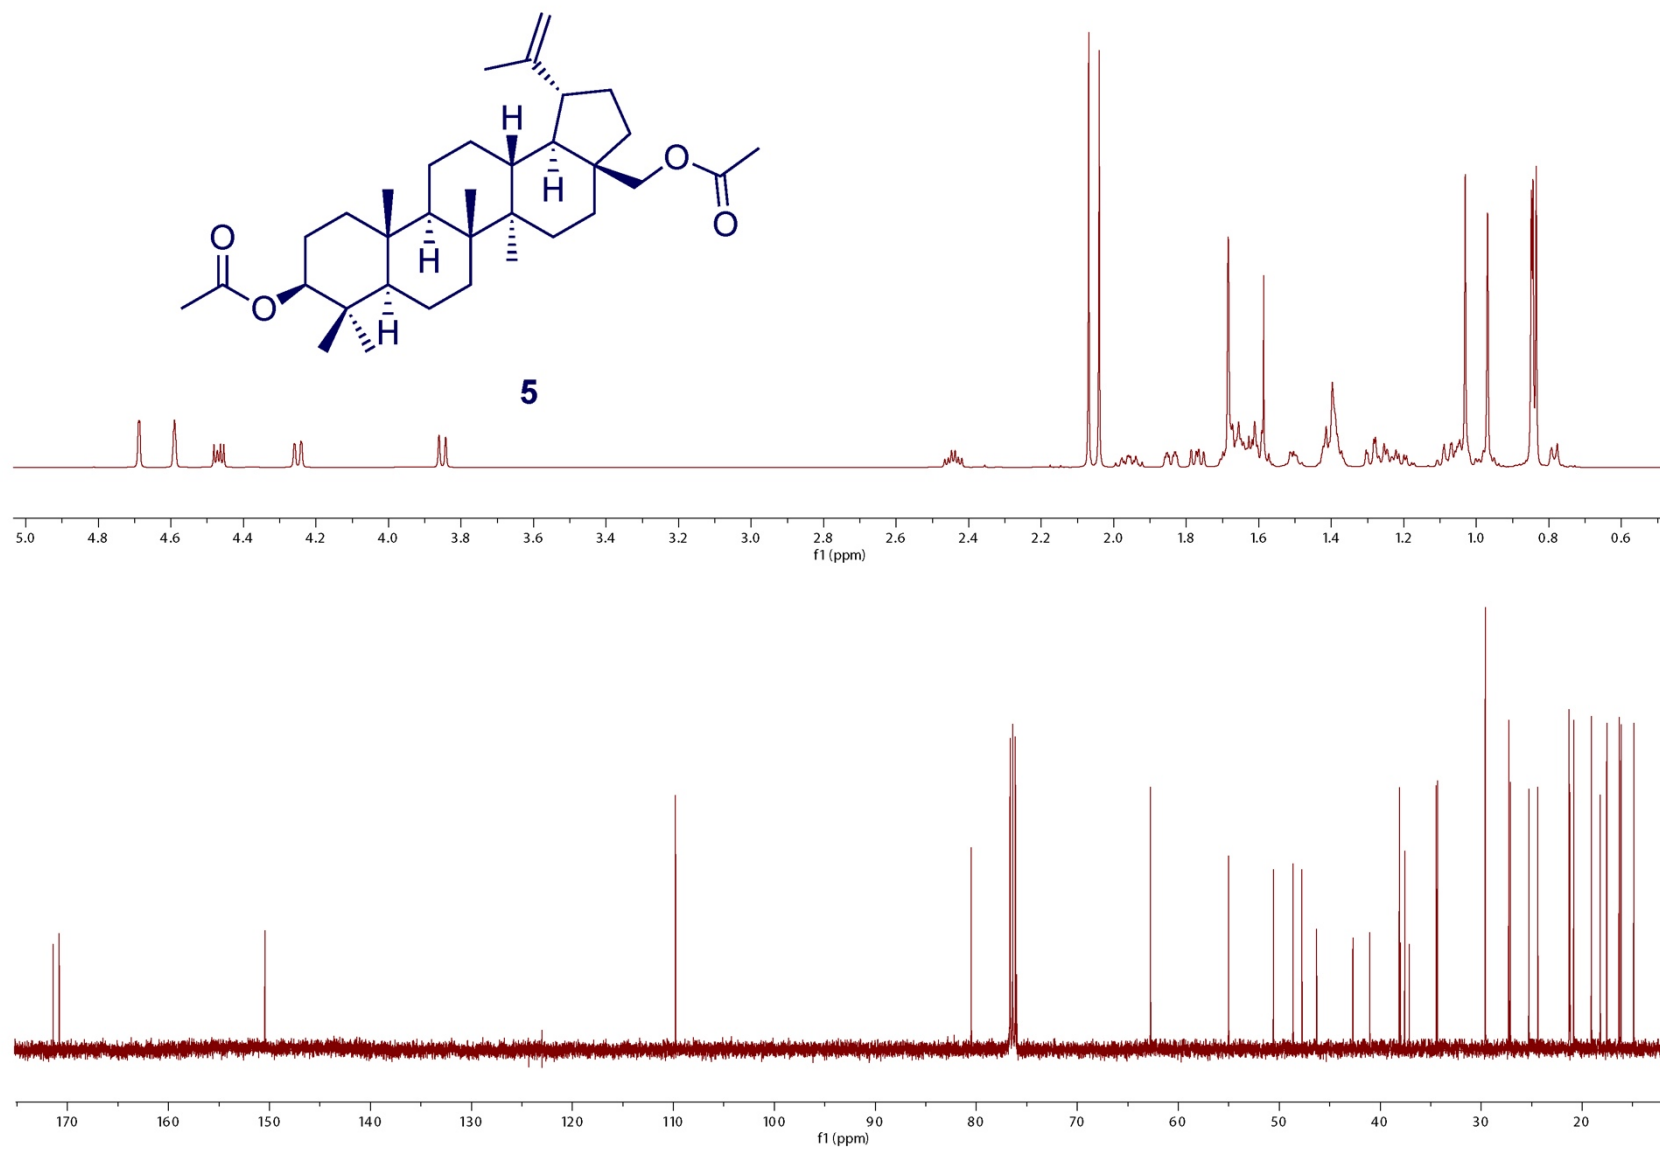

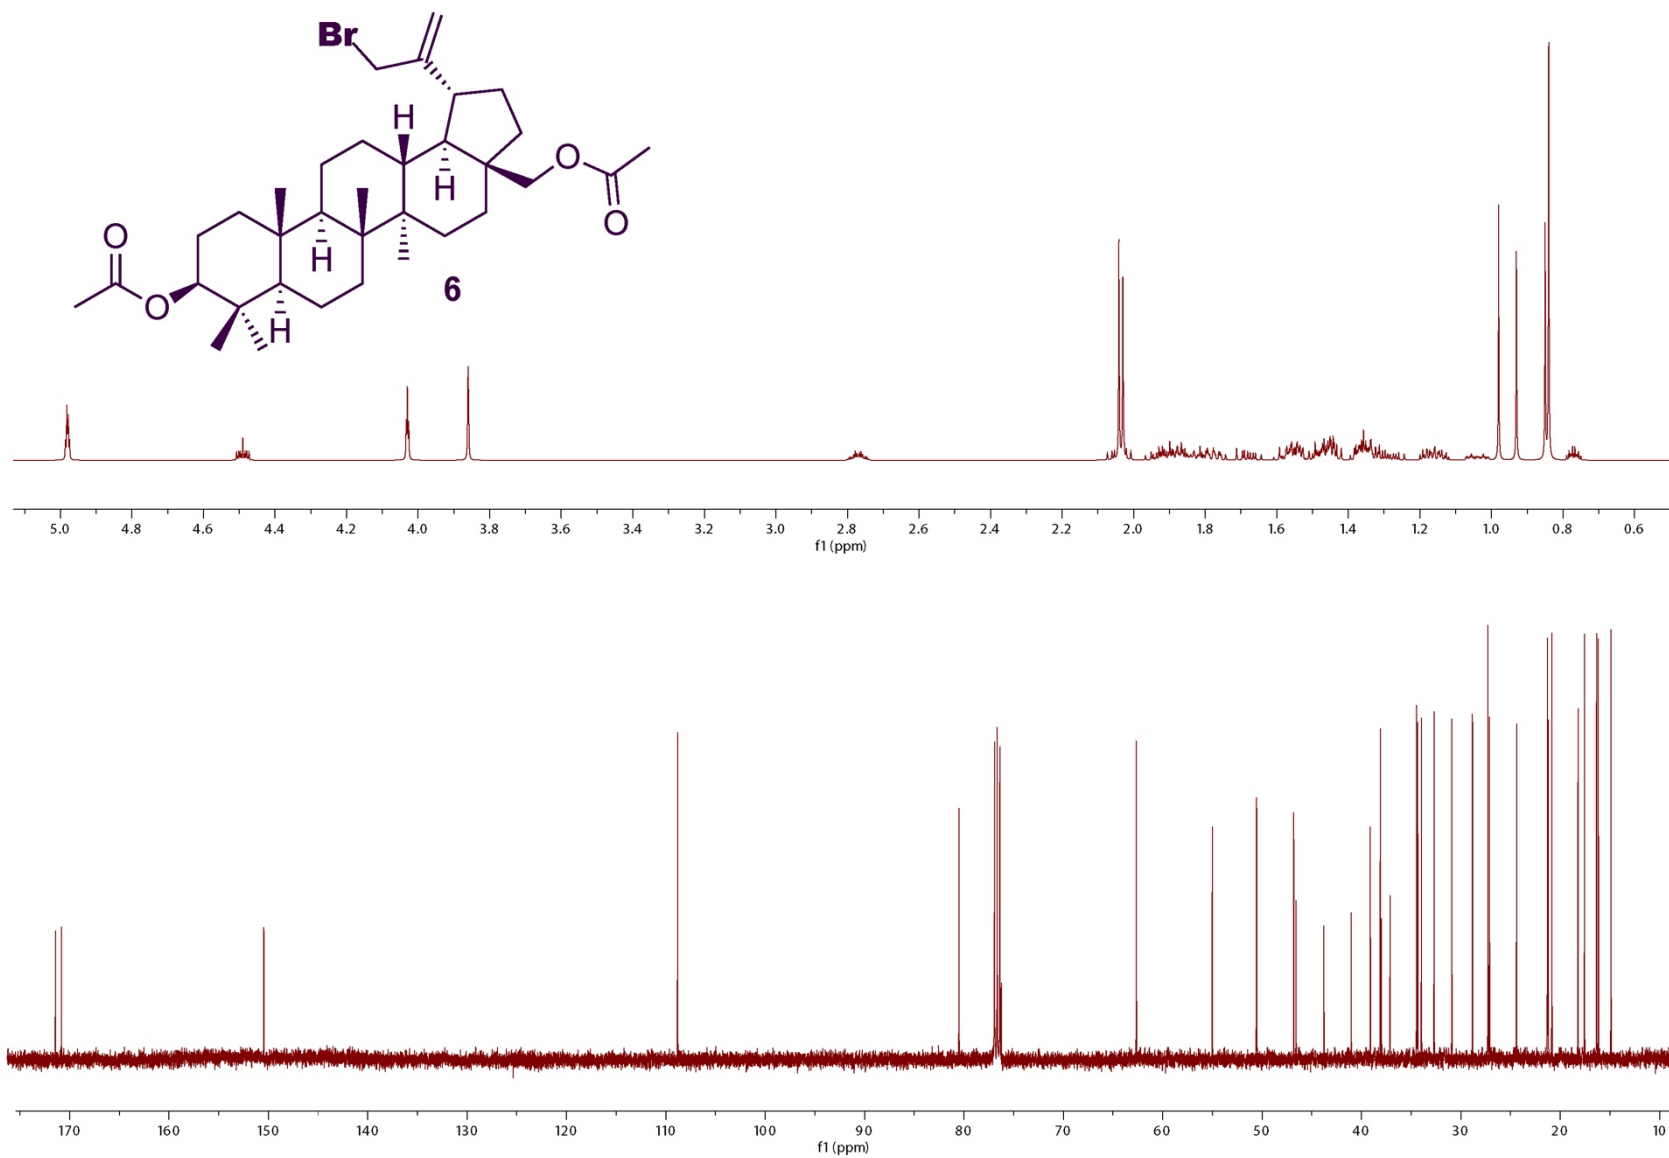

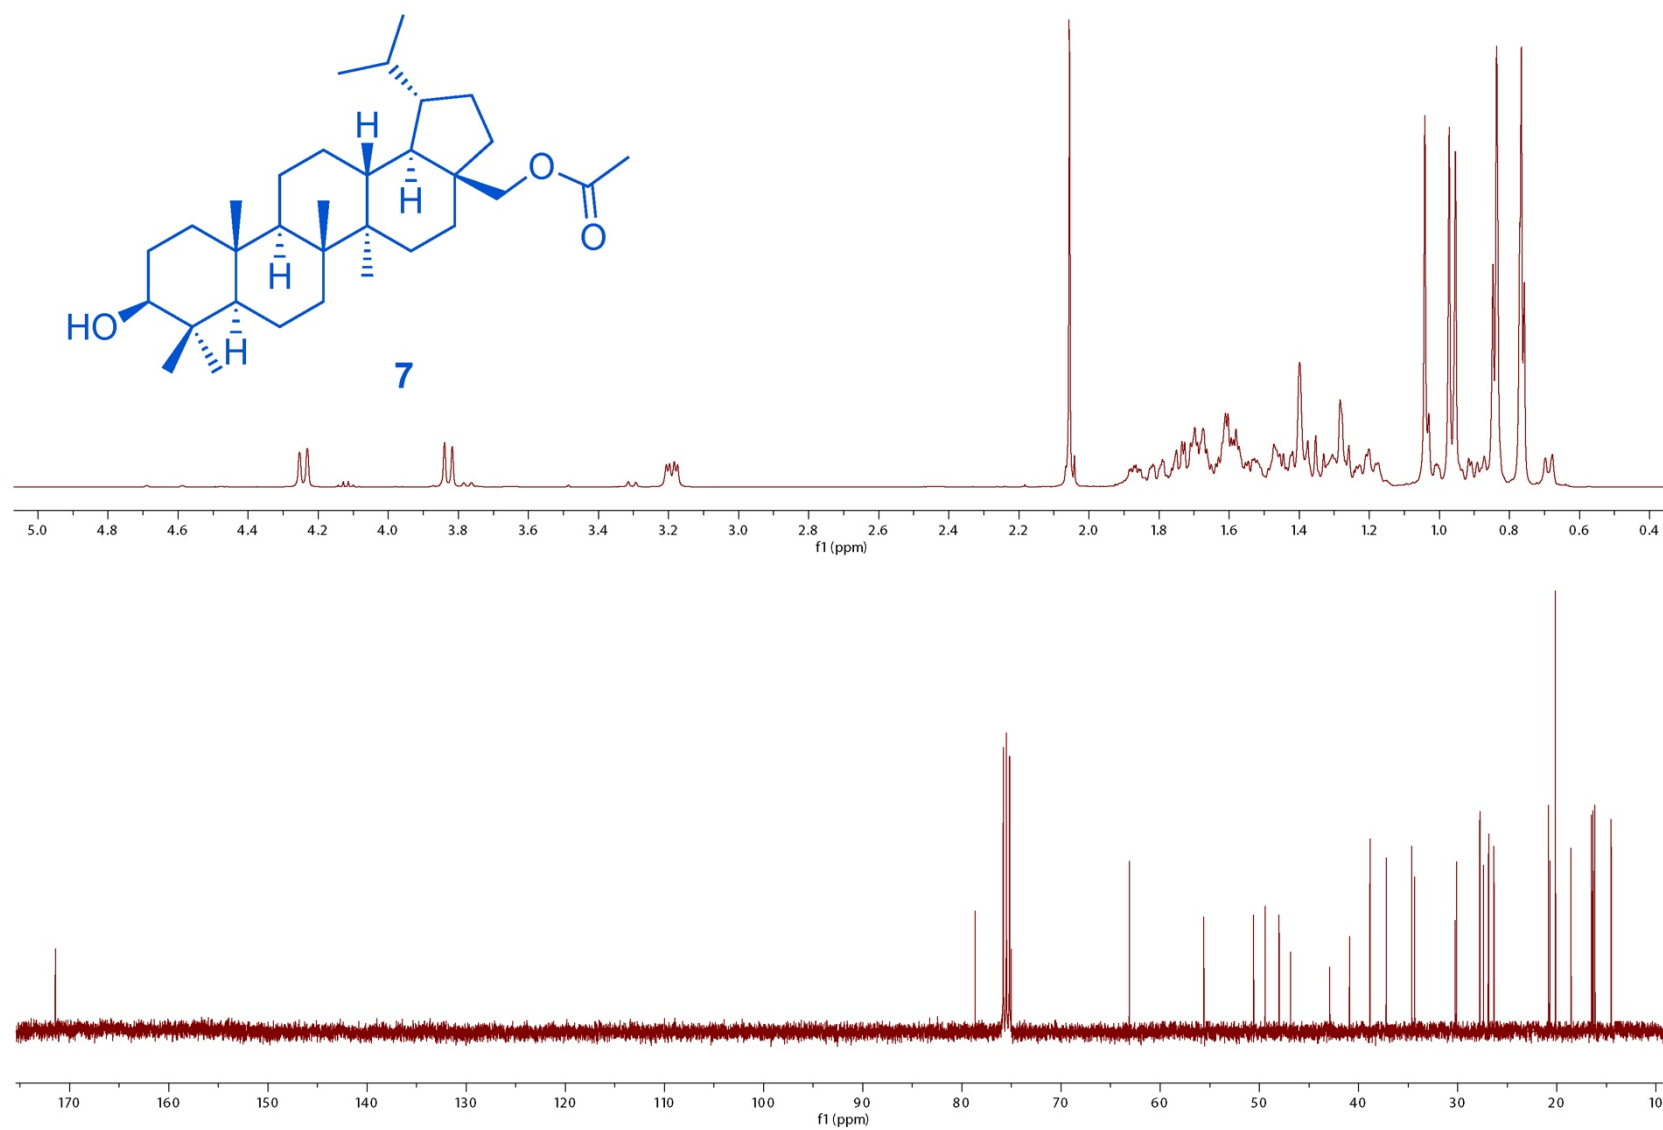

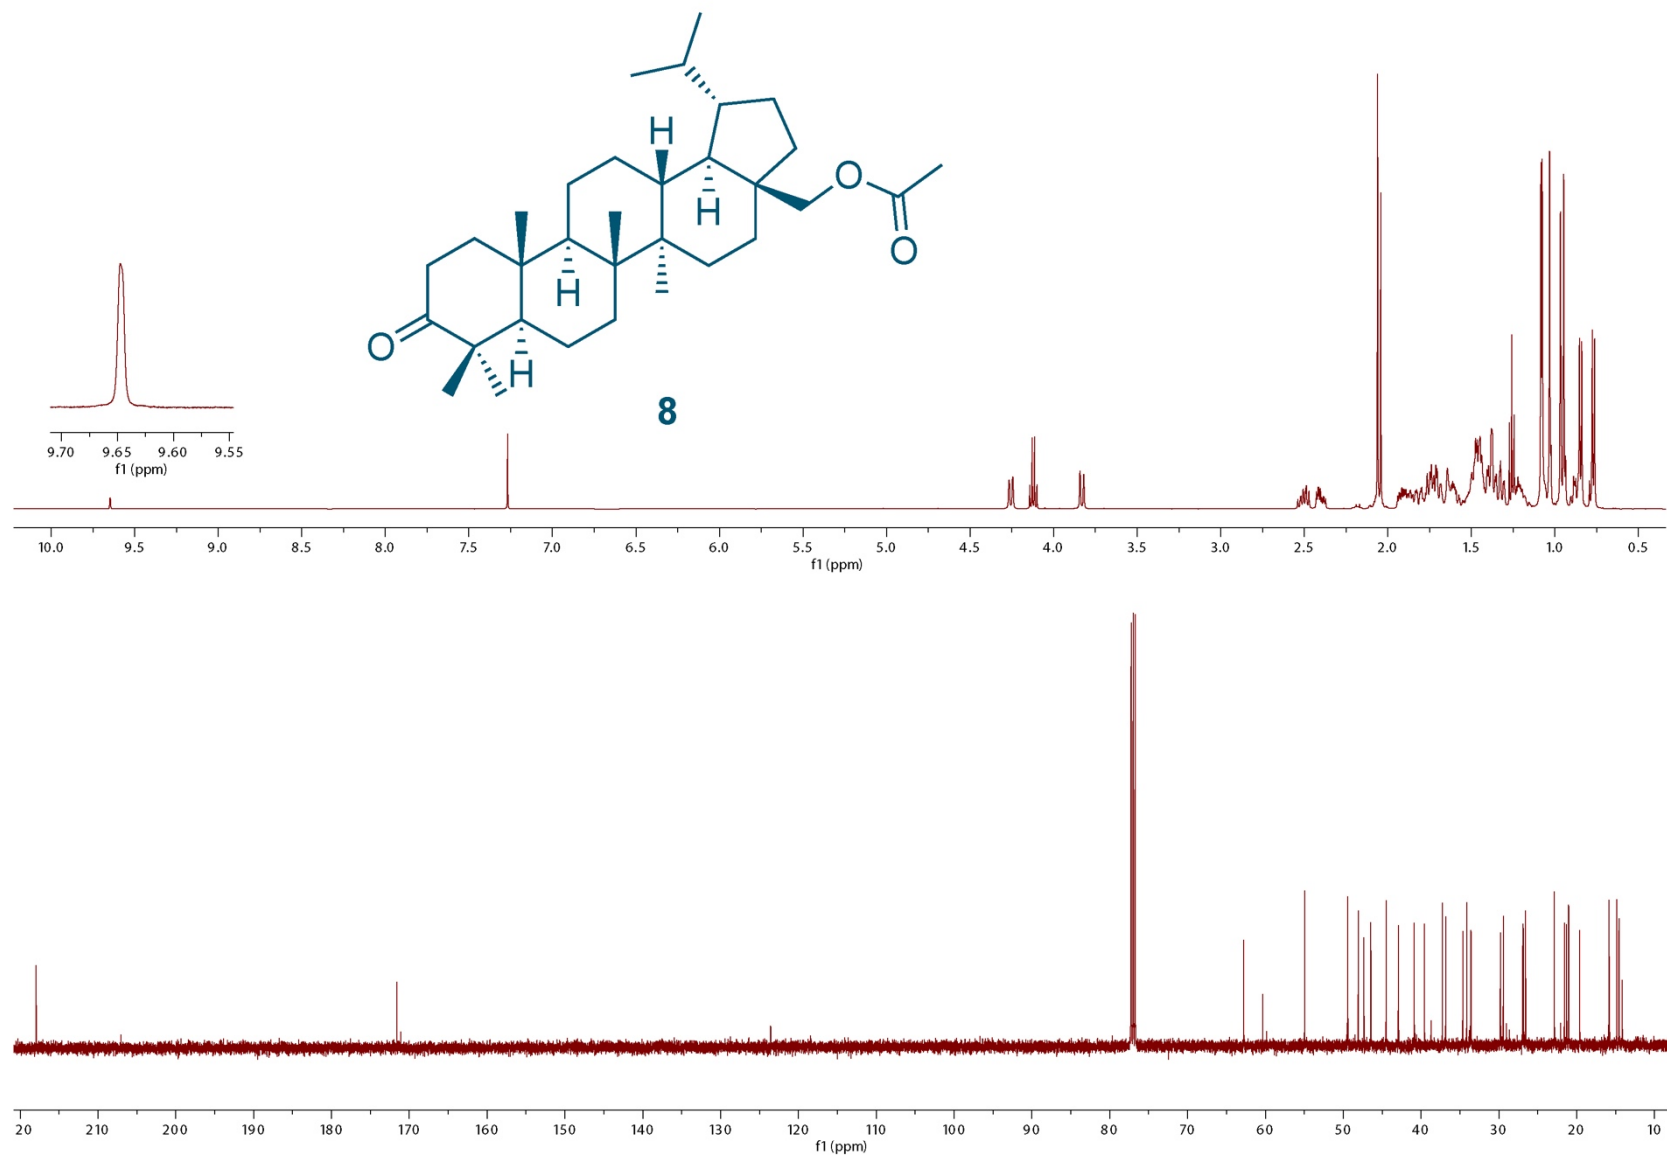

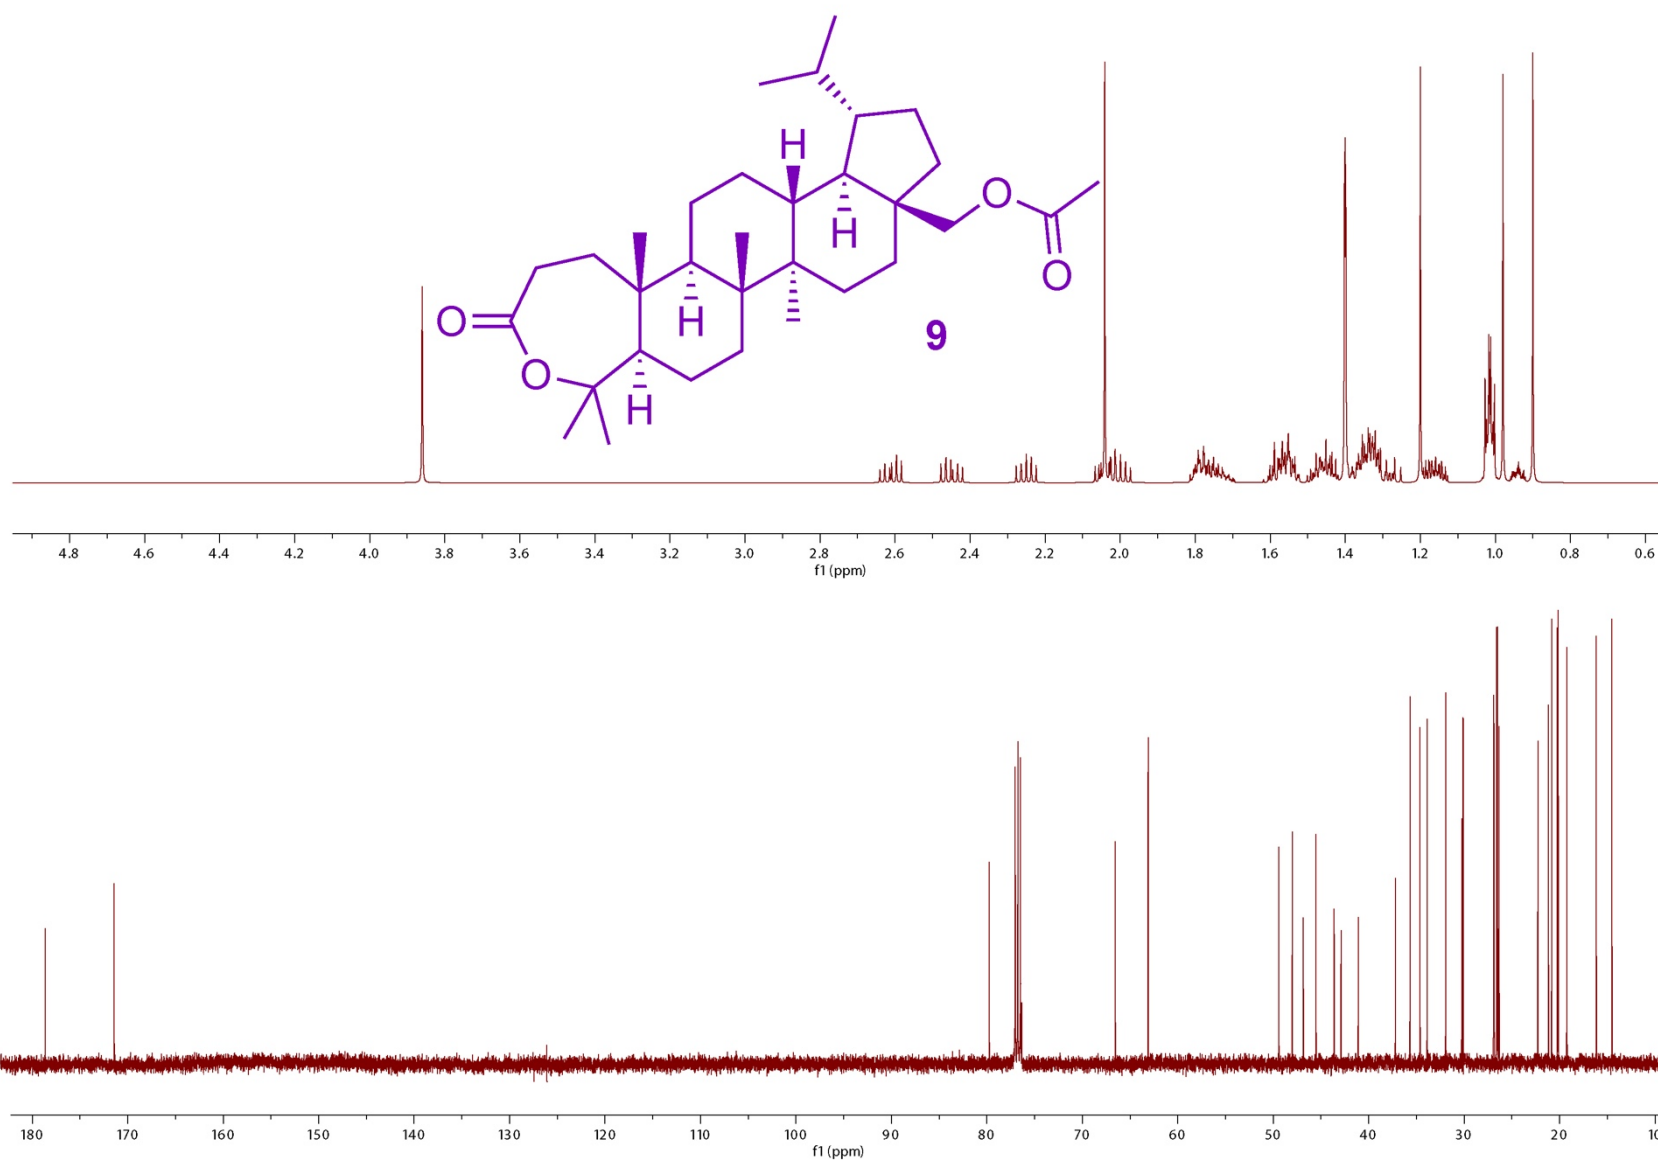

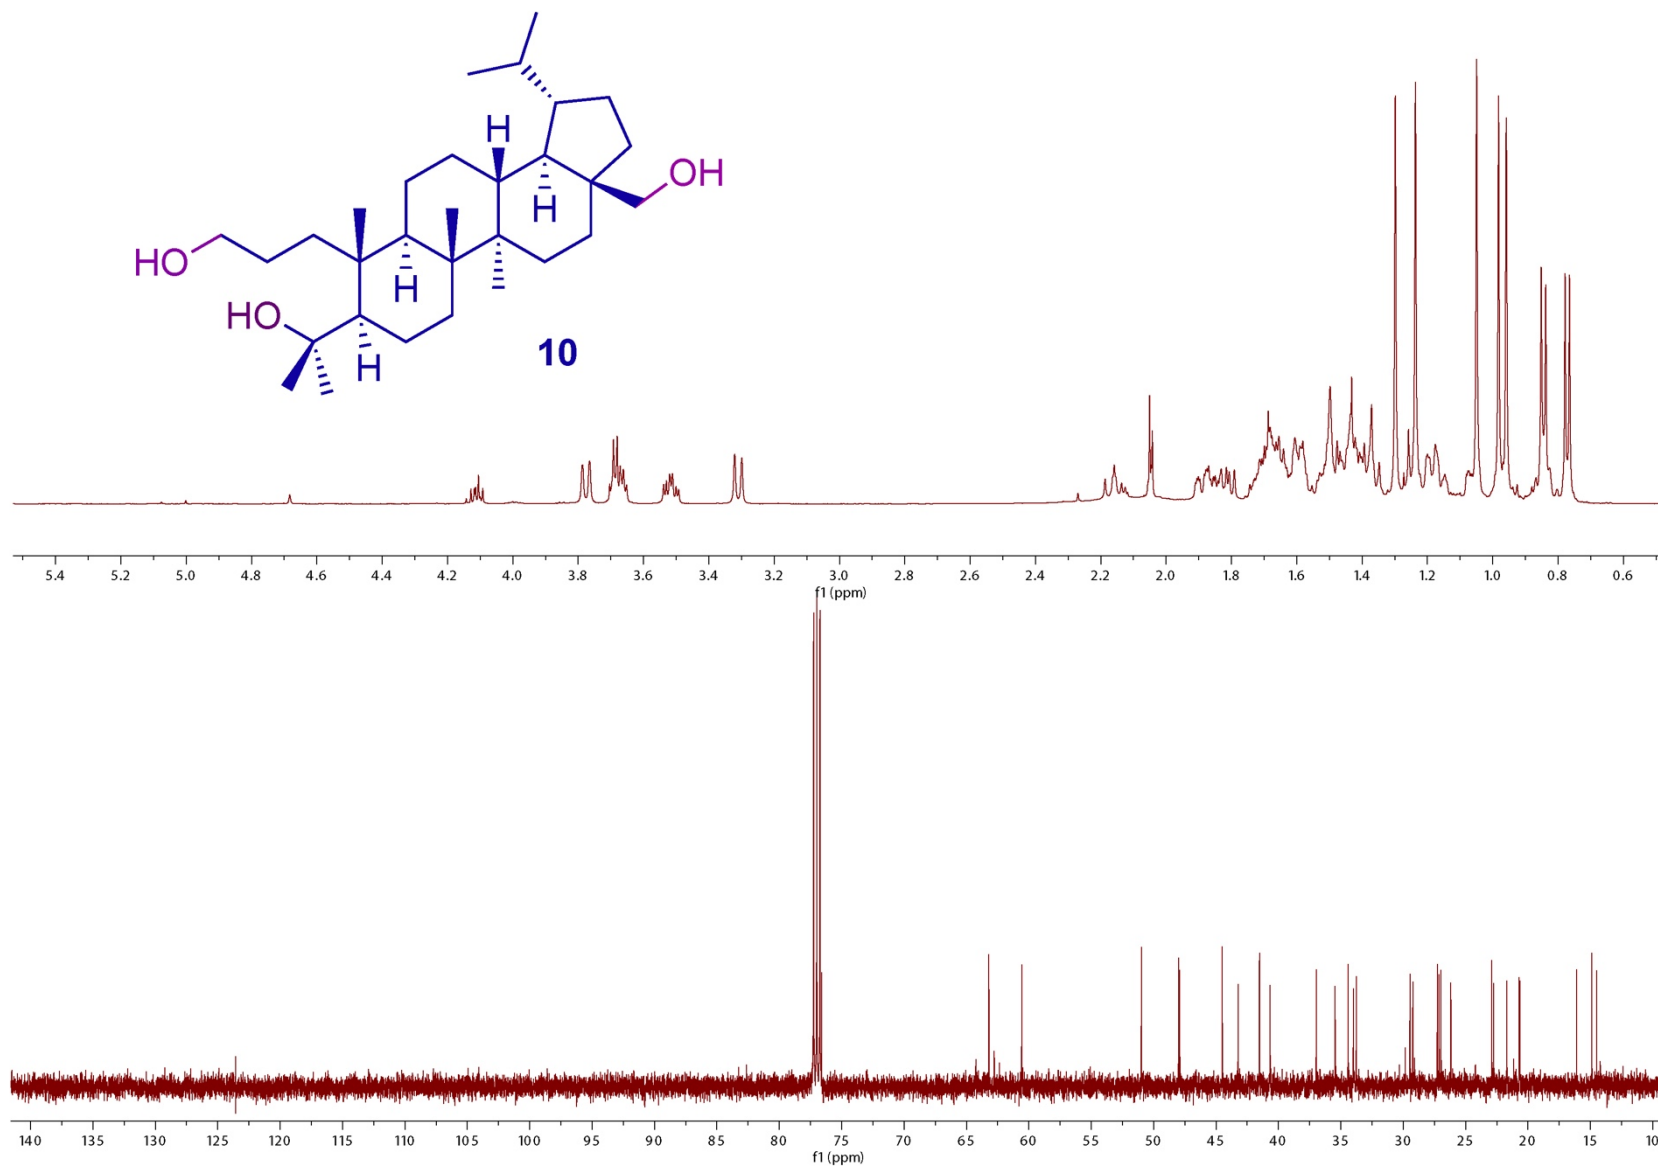

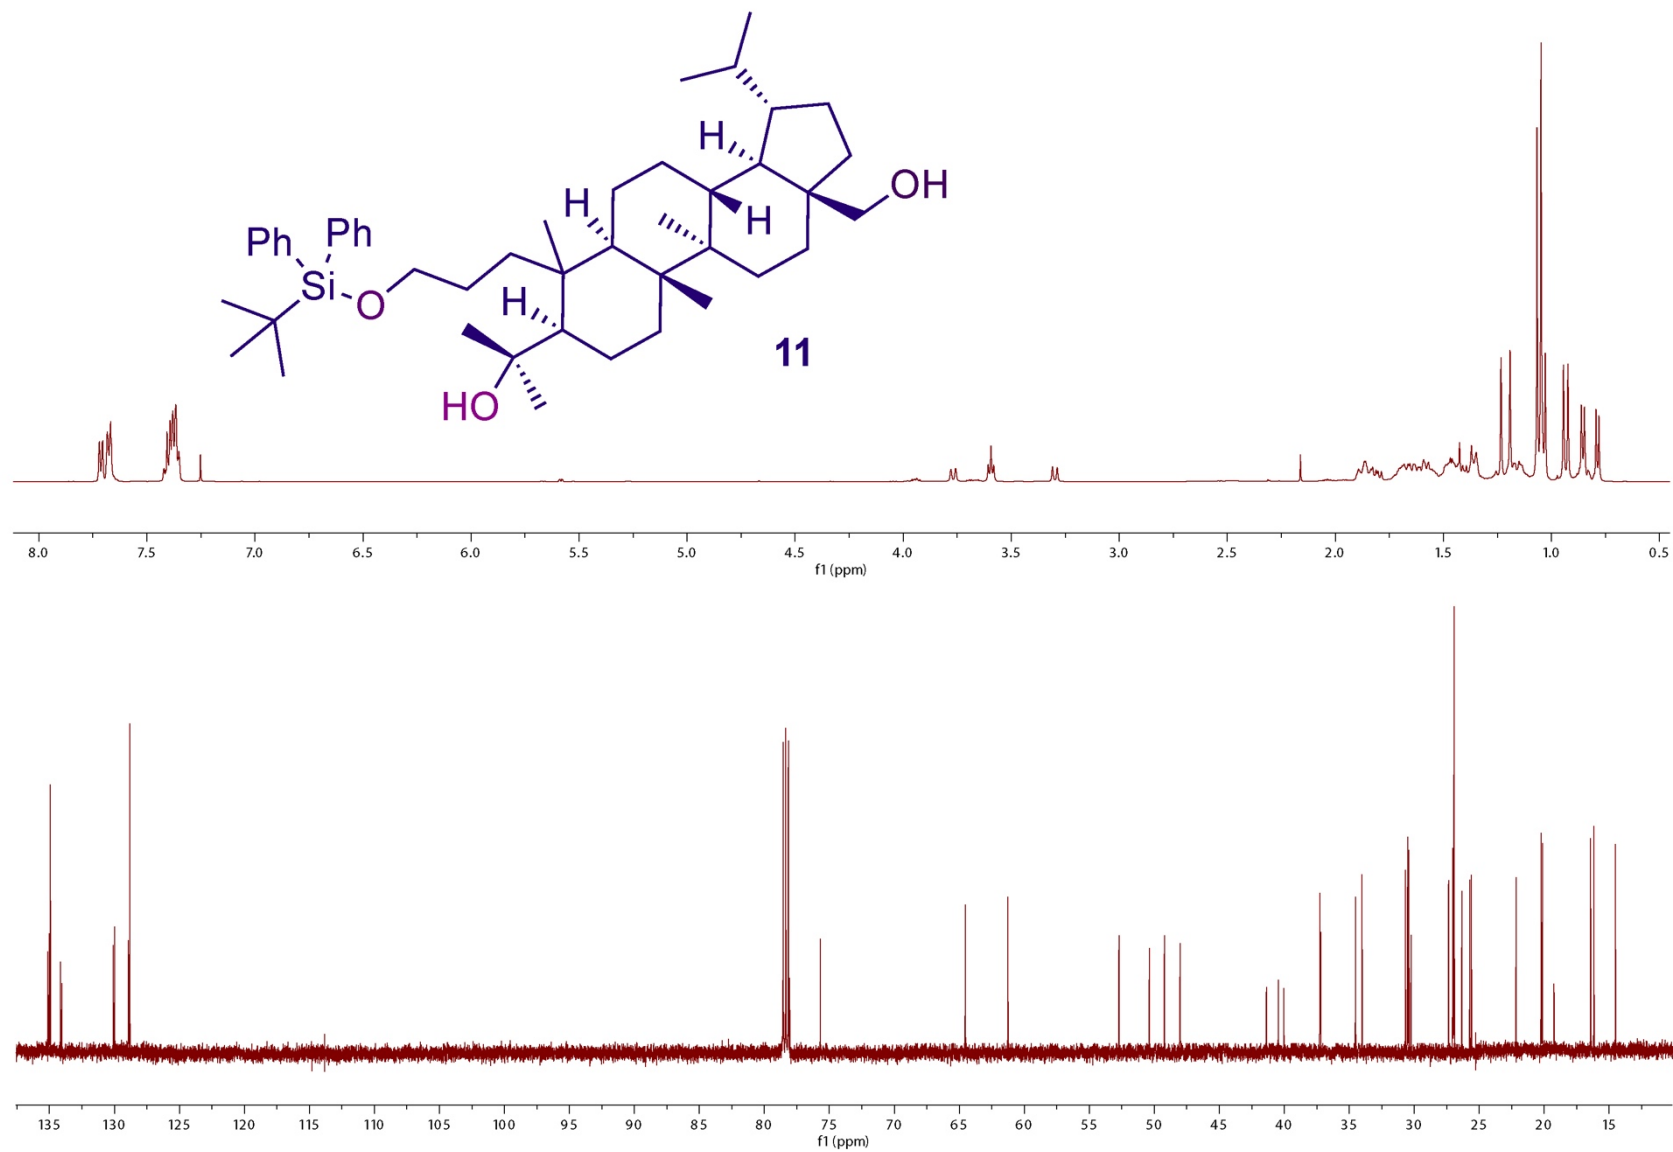

Supplement: s1 [file s1]
